# Supplementary material for: Characterisation of neurons derived from a cortical human neural stem cell line CTX0E16
Source: PubMed Central journal article supplement (PMC4546258; doi:10.1186/s13287-015-0136-8), 2015-08-22
Supplement: 13287_2015_136_MOESM1_ESM.pdf [file 13287_2015_136_MOESM1_ESM.pdf]

**Characterisation of neurons derived from a cortical human neural stem cell  
line CTX0E16**

Greg W. Anderson<sup>1\*</sup>, P. J. Michael Deans<sup>1\*</sup>, Ruth D. T. Taylor<sup>2</sup>, Ding Chen<sup>1</sup>, Pooja Raval<sup>1</sup>, Harrison Lowder<sup>1</sup>, Srishti Murkerji<sup>1</sup>, Laura C. Andrae<sup>2</sup>, Deepak. P. Srivastava<sup>1§</sup>, Brenda P. Williams<sup>1§</sup>.

<sup>1</sup>Department of Basic and Clinical Neuroscience, Institute of Psychiatry Psychology and Neuroscience, and <sup>2</sup>MRC Centre for Developmental Neurobiology, King's College London, London, SE5 8AF, UK

\* = equal contribution

§ Address correspondence to: Deepak P Srivastava, 125 Coldharbour Lane, London, SE5 9NU, deepak.srivastava@kcl.ac.uk; or Brenda P. Williams 125 Coldharbour Lane, London, SE5 9NU, brenda.p.williams@kcl.ac.uk

**Supplemental Figure 1. Expression profile of undifferentiated and differentiated (DD28) CTX0E16 cells.** Undifferentiated CTX0E16 cells express a range of neurotransmitter receptors, signalling and disease associated proteins, which are upregulated during differentiation, as determined by RT-PCR. N = 3 independent experiments carried out in triplicate.

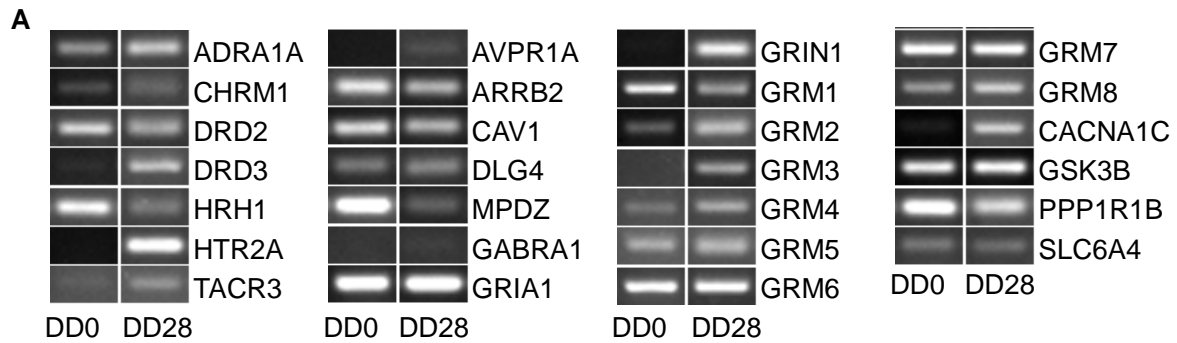

Anderson, Deans et al. Supplemental Figure 1

**Supplemental Table 1. List of Antibodies used in study.**

| <b>Antibody</b>                    | <b>Company</b>        | <b>Catalogue No.</b> | <b>Dilution</b> |
|------------------------------------|-----------------------|----------------------|-----------------|
| chicken $\alpha$ GFP               | Abcam                 | ab13970              | 1:10000         |
| chicken $\alpha$ MAP2              | Abcam                 | AB104896             | 1:1000          |
| mouse $\alpha$ Bassoon             | Assay Design          | SAP7F407             | 1:300           |
| mouse $\alpha$ CaMKII              | Abcam                 | ab52476              | 1:500           |
| mouse $\alpha$ GluA2               | NeuroMab/Antibody Inc | L21/32               | 1:500           |
| mouse $\alpha$ GluN1               | NeuroMab/Antibody Inc | N308/48              | 1:500           |
| mouse $\alpha$ GM130               | BD Biosciences        | 610823               | 1:250           |
| mouse $\alpha$ Nestin              | Millipore             | MAB5326              | 1:500           |
| mouse $\alpha$ O4                  | Sigma                 | O7139                | 1:1000          |
| mouse $\alpha$ PSD-95              | NeuroMab/Antibody Inc | K28/43               | 1:1000          |
| mouse $\alpha$ SAP97               | NeuroMab/Antibody Inc | K64/15               | 1:250           |
| mouse $\alpha$ SNAP-25             | Synaptic-Systems      | 111 011              | 1:1000          |
| mouse $\alpha$ VAMP2               | Synaptic-Systems      | 104 211              | 1:2000          |
| mouse $\alpha$ VGlut1              | Millipore             | MAB5502              | 1:250           |
| mouse $\alpha$ $\beta$ III Tubulin | Millipore             | MAB1637              | 1:1000          |
| rabbit $\alpha$ Calbindin D-28k    | SWant                 | CB-38a               | 1:20000         |
| rabbit $\alpha$ Calretinin         | SWant                 | 7699/4               | 1:10000         |
| rabbit $\alpha$ Cux1               | Santa Cruz            | sc-13024             | 1:500           |
| rabbit $\alpha$ Doublecortin       | Abcam                 | ab18723              | 1:500           |
| rabbit $\alpha$ GABA               | Sigma                 | A2052                | 1:1000          |
| rabbit $\alpha$ GAD65/67           | Millipore             | AB1511               | 1:250           |
| rabbit $\alpha$ Gephyrin           | Millipore             | AB5725               | 1:500           |
| rabbit $\alpha$ GluA1              | Millipore             | AB1504               | 1:500           |
| rabbit $\alpha$ Glutamate          | Sigma                 | G6642                | 1:500           |
| rabbit $\alpha$ KI-67              | Abcam                 | ab15580              | 1:500           |
| rabbit $\alpha$ PSD-95             | Cell Signalling       | 25075                | 1:1000          |
| rabbit $\alpha$ S100 $\beta$       | Dako                  | M7221                | 1:500           |
| rabbit $\alpha$ SOX2               | Millipore             | AB5603               | 1:100           |
| rabbit $\alpha$ Synapsin-1         | Cell Signalling       | 5297                 | 1:200           |
| rabbit $\alpha$ Tau                | Dako                  | A0024                | 1:500           |
| rabbit $\alpha$ Tbr1               | Abcam                 | ab31940              | 1:200           |
| rabbit $\alpha$ VGAT               | Millipore             | AB5062P              | 1:300           |
| rabbit $\alpha$ VGlut2             | Abcam                 | ab101756             | 1:500           |
| rat $\alpha$ CTIP2                 | Abcam                 | ab28448              | 1:500           |

**Supplemental Table 2. List and description of Primers used in RT- and q-PCR experiments.**

| <b>Gene</b>    | <b>Protein</b>                                                                                                                                                                                                                                                                         | <b>Sequence (5' – 3')</b>                                |
|----------------|----------------------------------------------------------------------------------------------------------------------------------------------------------------------------------------------------------------------------------------------------------------------------------------|----------------------------------------------------------|
| <i>ADRA1A</i>  | Adrenergic $\alpha_{1A}$ receptor (GPCR): high-affinity target for first and second generation antipsychotic drugs and may contribute to efficacy and side effect liability                                                                                                            | GAGAAGAAAGCGG<br>CCAAAAC<br>AGGGCTTGAAATCA<br>GGGAAG     |
| <i>ARRB2</i>   | $\beta$ -Arrestin 2 (scaffold and signalling protein): multifunctional scaffolding protein involved in GPCR desensitisation and G-protein independent signalling                                                                                                                       | TGTGGCTCAACTCG<br>AACAAAG<br>CTGAGCAGTGGGG<br>TTATGGT    |
| <i>AVPR1A</i>  | Arginine vasopressin receptor $V_{1A}$ (GPCR): Current interest as a target for the treatment of autism and schizophrenia. Receptor target of novel compounds to treat autism                                                                                                          | TTTGTGATCGTGAC<br>GGCTTA<br>TGGTGATGGTAGG<br>GTTTTCC     |
| <i>CACNA1C</i> | L-type, voltage-dependent calcium channel $\alpha_{1C}$ subunit: One of the major voltage-dependent $Ca^{2+}$ channel found in the CNS. Recently associated with risk of developing schizophrenia and bipolar disorder                                                                 | CCTGAGAATGAGGA<br>CGAAGG<br>GTTTTTCGGTGTGTA<br>CGGACT    |
| <i>CAMK2A</i>  | Calcium/Calmodulin-Dependent Protein Kinase II $\alpha$ is a serine/threonine protein kinase crucial for several aspects of plasticity at glutamatergic synapses                                                                                                                       | GAGCCATTCTCACC<br>ACGATGCT<br>TGGTGTTGGTGCTC<br>TCTGAGGA |
| <i>CAV1</i>    | Caveolin-1 (scaffold protein): Accessory protein involved in GPCR plasma membrane expression and internalisation                                                                                                                                                                       | GCGACCCTAAACAC<br>CTCAAC<br>CAAATGCCGTCAAA<br>ACTGTG     |
| <i>CHRM1</i>   | Cholinergic muscarinic $M_1$ receptor (GPCR): mixed-affinity target for range of antipsychotics. Selective compounds under investigated to treat cognitive symptoms and as possible monotherapy                                                                                        | GGACCCTACAGACC<br>CCTCTT<br>GTGTTTCATGGTGGC<br>TAGGTG    |
| <i>DLG4</i>    | Postsynaptic density protein 95 (PSD-95): Scaffold protein important for GPCR localisation and function                                                                                                                                                                                | TCTCCCACACACAT<br>TCCAGA<br>ACCCTGCCTTAGGA<br>GAGAGC     |
| <i>DRD2</i>    | Dopamine $D_2$ receptor (GPCR): high-affinity target for first and second generation antipsychotic drugs and associated with clinical efficacy                                                                                                                                         | ATCTCCTGCCCACT<br>CCTCTT<br>TGACAATGAAGGGC<br>ACGTAG     |
| <i>DRD3</i>    | Dopamine $D_3$ receptor (GPCR): high-affinity target for first and second generation antipsychotic drugs, difficult to functionally distinguish from dopamine $D_2$ receptors                                                                                                          | TGCCTATGCCTACT<br>CCATCC<br>GAGTGCTGCTTTTC<br>CAGCTT     |
| <i>EMX1</i>    | Homeobox protein EMX1 is a transcription factor expressed in the telencephalon. Emx1 plays a role in specification of positional identity, the proliferation of neural stem cells and differentiation of layer-specific neuronal phenotypes, especially those found in layers V and VI | GCCTTCGAGAAGAA<br>CCACTACG<br>CGGTTCTGGAACCA<br>CACCTTCA |
| <i>GABRA1</i>  | GABA receptor subunit $\alpha_1$ (ionotropic): Ubiquitous                                                                                                                                                                                                                              | CCATGAGGCTGACA<br>GTGAGA                                 |

|              |                                                                                                                                                                                                                                                                                                                                   |                                                          |
|--------------|-----------------------------------------------------------------------------------------------------------------------------------------------------------------------------------------------------------------------------------------------------------------------------------------------------------------------------------|----------------------------------------------------------|
|              | subunit for all GABA-A receptors – contains binding site for benzodiazepine anxiolytics                                                                                                                                                                                                                                           | ATTTTAGTGGGCAA<br>GCATGG                                 |
| <i>GRIA2</i> | Glutamate receptor 2 (AMPA receptor subunit, ionotropic): allosteric modulators of this receptor currently under investigation as possible adjunct treatment for cognitive deficits and monotherapy                                                                                                                               | TTCAGATGAGACCC<br>GACCTC<br>GCACAGCTTGCAGT<br>GTTGAT     |
| <i>GRIN1</i> | Glutamate receptor, N-methyl D-aspartate (NMDA) 1 (NR1, ionotropic): allosteric modulators currently in phase II clinical trial for the treatment of cognitive and negative symptoms                                                                                                                                              | AGATGGCTCTGTCC<br>GTGTG<br>GTGGGAGTGAAGT<br>GGTCGTT      |
| <i>GRM1</i>  | Metabotropic glutamate receptors 1 (mGluR1)<br>Metabotropic glutamate receptors 1-8 (mGluR <sub>1-8</sub> , GPCRs): several of these are targeted by compounds currently in clinical and preclinical development for the treatment of schizophrenia – particularly mGluR <sub>2</sub> , mGluR <sub>3</sub> and mGluR <sub>5</sub> | CTAGCTGGCATCTT<br>CCTTGG<br><br>TGAGGCAATGATCA<br>CCTGAG |
| <i>GRM2</i>  | Metabotropic glutamate receptors 2 (mGluR2)                                                                                                                                                                                                                                                                                       | CCGCAGAAGAACGT<br>GGTTAG<br>GCAAACAGTGGGG<br>ACAAACT     |
| <i>GRM3</i>  | Metabotropic glutamate receptors 3 (mGluR3)                                                                                                                                                                                                                                                                                       | GGTCTGATCCTGGT<br>GCAAAT<br>TTTGAAGGCGTACA<br>CAGTGC     |
| <i>GRM4</i>  | Metabotropic glutamate receptors 4 (mGluR4)                                                                                                                                                                                                                                                                                       | TCTGTCTCCAGCCC<br>TGTCTT<br>ACAGGAAAGAAAAC<br>GGCAGA     |
| <i>GRM5</i>  | Metabotropic glutamate receptors 5 (mGluR5)                                                                                                                                                                                                                                                                                       | ATCAGCGAGCTCAA<br>CTCCAT<br>CTGGATCTCTTTGG<br>GGATCA     |
| <i>GRM6</i>  | Metabotropic glutamate receptors 6 (mGluR6)                                                                                                                                                                                                                                                                                       | ATTGGGCAGTGTGG<br>AAGAAC<br>CCCAGTTCCTCAGC<br>TCACTC     |
| <i>GRM7</i>  | Metabotropic glutamate receptors 7 (mGluR7)                                                                                                                                                                                                                                                                                       | CGGCGCTATGACTT<br>CTTCTC<br>CTGCCTCTTTGGAA<br>ATCTGC     |
| <i>GRM8</i>  | Metabotropic glutamate receptors 8 (mGluR8)                                                                                                                                                                                                                                                                                       | GAGGATATTGGAAG<br>CAGCAA<br>TCAATTGATGCTCG<br>TTTGG      |
| <i>GSK3B</i> | Glycogen synthase kinase 3 $\beta$ (GSK-3 $\beta$ ): Important signalling node for neuronal activity and several neuropsychiatric drugs. Aberrant function has been linked to the schizophrenia                                                                                                                                   | GAGACCGTGGACA<br>GACCAAT<br>ACTGGTGGTTTTTC<br>CTGTGC     |
| <i>HRH1</i>  | Histamine H <sub>1</sub> receptor (GPCR): high-affinity target for first and second generation antipsychotic drugs and associated with weight gain and metabolic side effects                                                                                                                                                     | CACACTGAACCCCC<br>TCATCT<br>ATTTTGTTGCATCC<br>CCTCAG     |

|                |                                                                                                                                                                                                                                                                                                                                                   |                                                              |
|----------------|---------------------------------------------------------------------------------------------------------------------------------------------------------------------------------------------------------------------------------------------------------------------------------------------------------------------------------------------------|--------------------------------------------------------------|
| <i>HTR2A</i>   | 5-HT <sub>2A</sub> receptor (GPCR): high-affinity target for second and some first generation antipsychotic drugs, and has been associated with atypicality                                                                                                                                                                                       | CAGAATCCCATCCA<br>CCACA<br>TCCTGTAGCCCAA<br>GACTGG           |
| <i>MPDZ</i>    | Multiple PDZ domain protein (MUPP1): Scaffold protein important for GPCR localisation and function                                                                                                                                                                                                                                                | CCATAGTTTCCCGT<br>TCTCCA<br>CAATCGTTTCCATG<br>TGTTGC         |
| <i>PPP1R1B</i> | Protein phosphatase 1 regulatory subunit 1B (PPP1R1B), aka. dopamine- and cAMP-regulated neuronal phosphoprotein (DARPP-32)                                                                                                                                                                                                                       | CCCTAAGATCTGGG<br>GAAAGG<br>CTGGTAGAAGCCG<br>GTGAGAG         |
| <i>SLC6A4</i>  | 5-HT transporter (SERT): Primary target of selective serotonin reuptake inhibitor (SSRI) antidepressants                                                                                                                                                                                                                                          | TGCCACCTTCCTGT<br>CTCTCT<br>GCCAAGCCATGGT<br>GACTAAT         |
| <i>TACR3</i>   | Tachykinin 3 receptor (NK <sub>3</sub> , GPCR): target of compounds currently in phase II clinical trial for the treatment of schizophrenia                                                                                                                                                                                                       | AGGCCGTA CTCTCT<br>GCTTTG<br>TGATGAGCAATGGG<br>AAACAG        |
| <i>TBR1</i>    | T-box, brain, 1 is a transcription factor important in vertebrate embryo development. This gene is also known by several other names: T-Brain 1, TBR-1, TES-56, and MGC141978. TBR1 interacts with various genes and proteins in order to regulate cortical development, specifically within layer VI of the developing six-layered human cortex. | TAACAATGGGCAGA<br>TGGTGG<br>AGGGAAAGTGAAC<br>GTCTGCA         |
| <i>GAPDH</i>   | Used as housekeeping gene in q-PCR                                                                                                                                                                                                                                                                                                                | CCTGACCTGCCGTC<br>TAGAAA<br>ACCTGGTGCTCAGT<br>GTAGCC         |
| <i>HPRT1</i>   | Used as housekeeping gene in q-PCR                                                                                                                                                                                                                                                                                                                | TGACACTGGCAAAA<br>CAATGCA<br>GGTCCTTTTCACCA<br>GCAAGCT       |
| <i>RPL13A</i>  | Used as housekeeping gene in q-PCR                                                                                                                                                                                                                                                                                                                | CCTGGAGGAGAAG<br>AGGAAAGAGA<br>TTGAGGACCTCTGT<br>GTATTTGTCAA |

List of forward (F) and reverse (R) primer sequences used in gene expression studies; forward primer is described first. A brief description of the encoding protein and potential relevance for disease biology is also given.
